# Supplementary material for: Polymer blend lithography: A versatile method to fabricate nanopatterned self-assembled monolayers
Source: publisher site journal article supplement (doi:10.3762/bjnano.3.71), 2012-09-04

---

## Supporting Information

for

### **Polymer blend lithography: A versatile method to fabricate nanopatterned self-assembled monolayers**

Cheng Huang<sup>1,2,3</sup>, Markus Moosmann<sup>1,2</sup>, Jiehong Jin<sup>1,2</sup>, Tobias Heiler<sup>1,2</sup>,  
Stefan Walheim\*<sup>1,2</sup> and Thomas Schimmel<sup>1,2</sup>

Address: <sup>1</sup>Institute of Nanotechnology (INT), Karlsruhe Institute of Technology (KIT), 76021 Karlsruhe, Germany, <sup>2</sup>Institute of Applied Physics and Center for Functional Nanostructures (CFN), Karlsruhe Institute of Technology (KIT), 76128 Karlsruhe, Germany and <sup>3</sup>Joint Research Laboratory Nanomaterials Karlsruhe Institute of Technology (KIT)/Darmstadt University of Technology, 64287 Darmstadt, Germany

Email: Stefan Walheim\* - [stefan.walheim@kit.edu](mailto:stefan.walheim@kit.edu)

\*Corresponding author

### **Snow-jet treatment of FDTS-SAM**

## Stability of FDTS-SAM against snow-jet treatment

The AFM pictures below show the stability of the FDTS-SAM against snow-jet treatment. The left picture was taken after a soft treatment, which lasted for about 30 seconds, while the right one was treated for 5 minutes. Both of the pictures have a scanning range of  $5 \times 5 \mu\text{m}$  and were taken in contact mode in water. The results show that there is no observable change of the depth of the holes after a thorough snow-jet treatment. This proves that the FDTS-SAM is stable against this lift-off method.

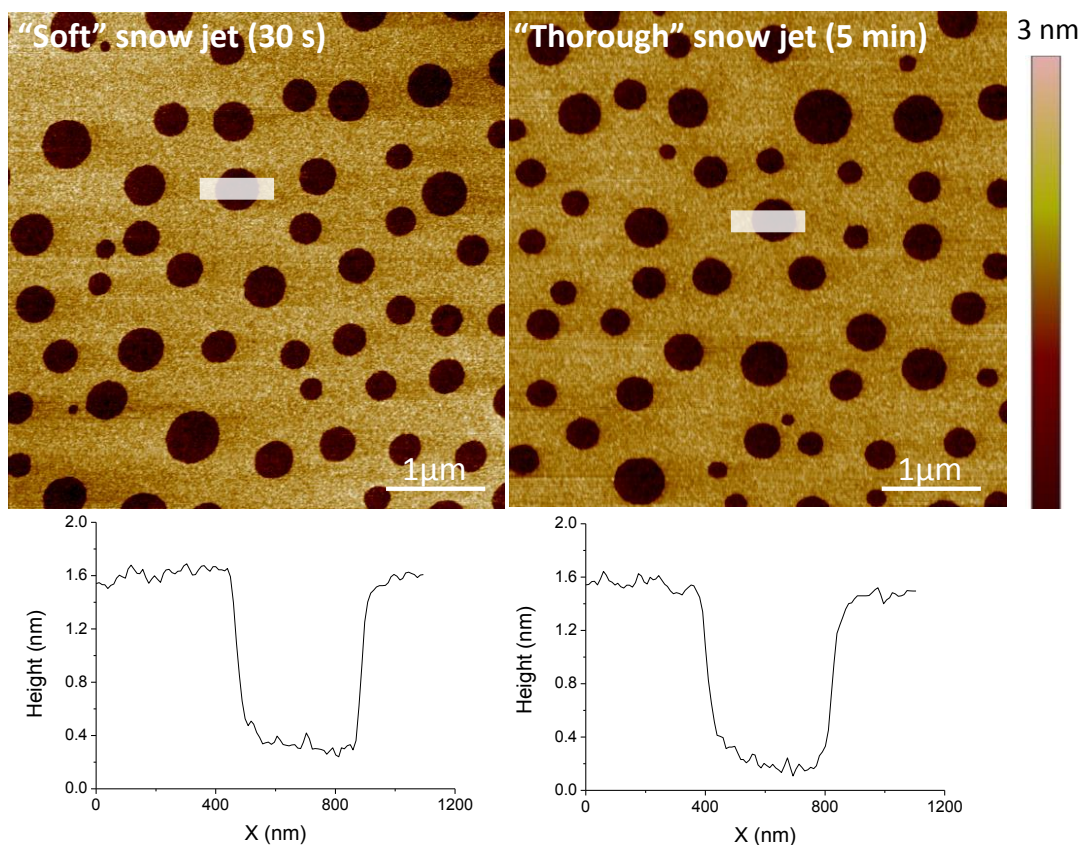

Supplement: Additional file 1 [file 2190-4286-3-71-S1.pdf]
